# Supplementary material for: Cytotoxic Potential of Bioactive Compounds From Aspergillus Flavus, an Endophytic Fungus Isolated From Cynodon dactylon: Experimental and Computational Approach
Source: Preprints.org preprint supplement (doi:10.20944/preprints202211.0481.v1), 2022-11-25

Supplementary Data for

**Cytotoxic and cytostatic potential of bioactive secondary metabolites from *Aspergillus flavus*, anendophytic fungus isolated from *Cynodon dactylon* against breast cancer*:* *in vitro* and *in silico* studies**

Arjun Kumar Kalimuthu1, Pavadai Parasuraman2, Theivendren Panneerselvam3, Ewa Babkiewicz4, Joanna Pijanowska4, Piotr Mrowka5,6, Gopalan Rajagopal7, Venkataraman Deepak1,8, Krishnan Sundar1*, Piotr Maszczyk4*, Selvaraj Kunjiappan1*

1Department of Biotechnology, Kalasalingam Academy of Research and Education, Krishnankoil-626126, India.

2Department of Pharmaceutical Chemistry, Faculty of Pharmacy, M.S. Ramaiah University of Applied Sciences, Bengaluru-560054, India.

3Department of Pharmaceutical Chemistry, Swamy Vivekanandha College of Pharmacy, Elayampalayam-637205, India.

4Department of Hydrobiology, Faculty of Biology, University of Warsaw at Biology and Chemistry Research Center, 02-089 Warsaw, Poland.

5Department of Biophysics, Physiology and Pathophysiology, Medical University of Warsaw, 5 Chalubinskiego Street, 02-004 Warsaw, Poland.

6Department of Experimental Hematology, Institute of Hematology and Transfusion Medicine, 5 Chocimska Street, 00-791 Warsaw, Poland.

7Postgraduate and Research Department of Zoology,Ayya Nadar Janaki Ammal College, Sivakasi-626123, India.

8Maternal and Fetal Health Research Centre, 5th Floor St. Mary's Hospital, University of Manchester, Oxford Road Manchester, M13 9WL, United Kingdom.

***Correspondence address:**

Krishnan Sundar: [sundarkr@klu.ac.in](mailto:sundarkr@klu.ac.in); Ph: +91 9486953248

Piotr Maszczyk: [fizbanek@wp.pl](mailto:fizbanek@wp.pl); Ph: +48 22 55 26568

Selvaraj Kunjiappan; [selvapharmabio@gmail.com](mailto:selvapharmabio@gmail.com); Ph: +91 9994972108

This MS word file includes:

Supplementary Tables S1 to S2.

Table S1: MTT assay

| Conc | control | 3.125 | 6.25 | 12.5 | 25 | 50 | 100 | Dox 0.25 μM |
| --- | --- | --- | --- | --- | --- | --- | --- | --- |
|  | 100 | 85.12 | 64.84 | 53.19 | 47.45 | 38.24 | 28.09 | 45 |
|  |  | 86.49 | 64.04 | 52.66 | 47.45 | 38.24 | 26.49 | 43.67 |
|  |  | 87.29 | 60.85 | 53.99 | 48.24 | 39.31 | 26.22 | 43.14 |

| Group Name | N | Missing | Mean | Std Dev | SEM |
| --- | --- | --- | --- | --- | --- |
|  |  |  | 100 | 0 | 0 |
| Col 1 | 3 | 0 | 86.3 | 1.097 | 0.634 |
| Col 2 | 3 | 0 | 63.243 | 2.111 | 1.219 |
| Col 3 | 3 | 0 | 53.28 | 0.67 | 0.387 |
| Col 4 | 3 | 0 | 47.713 | 0.456 | 0.263 |
| Col 5 | 3 | 0 | 38.597 | 0.618 | 0.357 |
| Col 6 | 3 | 0 | 26.933 | 1.011 | 0.584 |
| Col 7 | 3 | 0 | 43.937 | 0.958 | 0.553 |
|  |  |  |  |  |  |
| Source of Variation | DF | SS | MS | F | P |
| Between Groups | 6 | 6580.917 | 1096.82 | 888.816 | <0.001 |
| Residual | 14 | 17.276 | 1.234 |  |  |
| Total | 20 | 6598.193 |  |  |  |


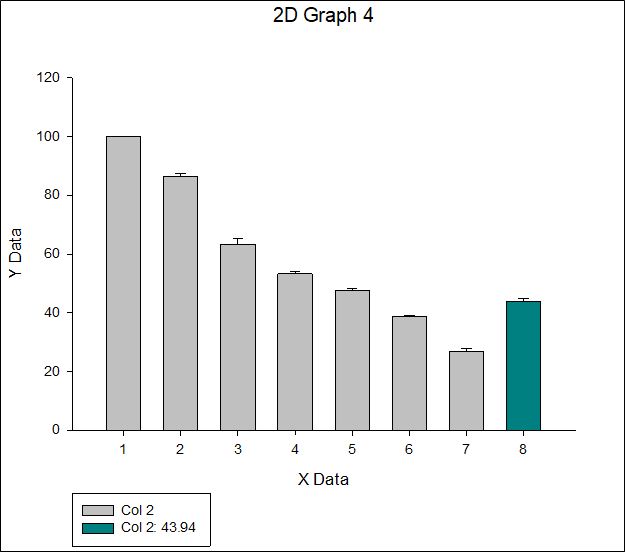


Table S2: ROS generation assay

|  |  |  | ctrl | 24 | 48 |
| --- | --- | --- | --- | --- | --- |
|  |  |  | 21.34 | 55.63 | 72.87 |
|  |  |  | 20.56 | 54.34 | 73.38 |
|  |  |  | 22.71 | 56.58 | 71.41 |
|  |  |  |  |  |  |
| Group Name | N | Missing | Mean | Std Dev | SEM |
| Col 2 | 3 | 0 | 21.537 | 1.088 | 0.628 |
| Col 3 | 3 | 0 | 55.517 | 1.124 | 0.649 |
| Col 4 | 3 | 0 | 72.553 | 1.022 | 0.59 |
|  |  |  |  |  |  |
| Source of Variation | DF | SS | MS | F | P |
| Between Groups | 2 | 4047.589 | 2023.794 | 1737.61 | <0.001 |
| Residual | 6 | 6.988 | 1.165 |  |  |
| Total | 8 | 4054.577 |  |  |  |


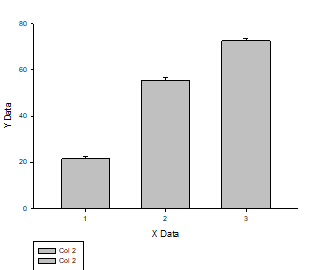

Supplement: Supplementary file 1 [file supplementary]
